# Supplementary material
Source: MDPI journal article supplement (https://www.mdpi.com/2073-4395/13/11/2824)
Supplement: s1 [file s1]

## Supplementary Materials

**Table S1.** *Colletotrichum* spp. used in multi-gene analysis in this study.

| Species                   | Isolates    | Host/substrate                              | Country                 | GenBank no. |          |          |          |          |
|---------------------------|-------------|---------------------------------------------|-------------------------|-------------|----------|----------|----------|----------|
|                           |             |                                             |                         | ITS         | ACT      | CAL      | CHS      | GAPDH    |
| <i>C. aenigma</i>         | ICMP 18686* | <i>Pyrus pyrifolia</i>                      | Japan                   | JX010243    | JX009519 | JX009684 | JX009789 | JX009913 |
| <i>C. asianum</i>         | ICMP 18580  | <i>Coffea arabica</i>                       | Thailand                | FJ972612    | JX009584 | FJ917506 | JX009867 | JX010053 |
| <i>C. aotearoa</i>        | ICMP 18537  | <i>Coprosma</i> sp.                         | New Zealand             | JX010205    | JX009564 | JX009611 | JX009853 | JX010005 |
| <i>C. boninense</i>       | CBS 123755* | <i>Crinum asiaticum</i> var. <i>sinicum</i> | Japan                   | JX010292    | JX009583 | JQ005674 | JX009827 | JX009905 |
| <i>C. clidemiae</i>       | ICMP 18706* | <i>Clidemia hirta</i>                       | USA                     | JX010274    | JX009476 | JX009639 | JX009777 | JX009909 |
| <i>C. cordylinicola</i>   | ICMP 18579* | <i>Cordyline fruticosa</i>                  | Thailand                | JX010226    | HM470235 | HM470238 | JX009864 | JX009975 |
| <i>C. fructicola</i>      | ICMP 18581* | <i>Coffea arabica</i>                       | Thailand                | JX010165    | FJ907426 | FJ917508 | JX009866 | JX010033 |
|                           | CBS 120005* | <i>Fragaria × ananassa</i>                  | USA                     | JX010175    | JX009534 | JX009673 | JX009792 | JX009926 |
|                           | JD-ZJ-5     | <i>Fragaria × ananassa</i> , crown          | Jiande, Zhejiang, China | MW513776    | MW513826 | MW513830 | MW513834 | MW513838 |
|                           | JD-ZJ-9     | <i>Fragaria × ananassa</i> , crown          | Jiande, Zhejiang, China | MW513777    | MW513827 | MW513831 | MW513835 | MW513839 |
| <i>C. gloeosporioides</i> | IMI 356878* | <i>Citrus sinensis</i>                      | Italy                   | JX010152    | JX009531 | JX009731 | JX009818 | JX010056 |
| <i>C. horri</i>           | ICMP 10492* | <i>Diospyros kaki</i>                       | Japan                   | GQ329690    | JX009438 | JX009604 | JX009752 | GQ329681 |
| <i>C. kahawae</i>         | ICMP 17816* | <i>Coffea arabica</i>                       | Kenya                   | JX010231    | JX009452 | JX009642 | JX009813 | JX010012 |
| <i>C. salsolae</i>        | ICMP 19051  | <i>Salsola tragus</i>                       | Hungary                 | JX010242    | JX009562 | JX009696 | JX009863 | JX009916 |
| <i>C. siamense</i>        | ICMP 17785* | <i>Malus domestica</i>                      | USA                     | JX010272    | JX009446 | JX009706 | JX009804 | JX010051 |
|                           | ICMP 18572* | <i>Vitis vinifera</i>                       | USA                     | JX010160    | JX009487 | JX009705 | JX009783 | JX010061 |
|                           | JD-ZJ-11    | <i>Fragaria × ananassa</i> , crown          | Jiande, Zhejiang, China | OR659012    | OR660065 | OR660070 | OR660075 | OR660080 |
|                           | JD-ZJ-14-1  | <i>Fragaria × ananassa</i> , crown          | Jiande, Zhejiang, China | OR659013    | OR660066 | OR660071 | OR660076 | OR660081 |
|                           | JD-ZJ-16    | <i>Fragaria × ananassa</i> , crown          | Jiande, Zhejiang, China | MW513761    | MW513851 | MW513899 | MW513870 | MW513923 |
|                           | JD-HY-20    | <i>Fragaria × ananassa</i> , crown          | Jiande, Zhejiang, China | OR659014    | OR660067 | OR660072 | OR660077 | OR660082 |
|                           | JD-HX-A-6   | <i>Fragaria × ananassa</i> , crown          | Jiande, Zhejiang, China | MW513752    | MW513842 | MW513890 | MW513866 | MW513914 |
|                           | JD-HX-A-12  | <i>Fragaria × ananassa</i> , crown          | Jiande, Zhejiang, China | MW513753    | MW513843 | MW513891 | MW513867 | MW513915 |
|                           | JD-HX-A-16  | <i>Fragaria × ananassa</i> , crown          | Jiande, Zhejiang, China | MW513754    | MW513844 | MW513892 | MW513868 | MW513916 |
|                           | JD-HX-A-21  | <i>Fragaria × ananassa</i> , crown          | Jiande, Zhejiang, China | MW513755    | MW513845 | MW513893 | MW513869 | MW513917 |
|                           | JD-HX-A-30  | <i>Fragaria × ananassa</i> , crown          | Jiande, Zhejiang, China | OR659015    | OR660068 | OR660073 | OR660078 | OR660083 |
|                           | JD-TXZ-2    | <i>Fragaria × ananassa</i> , crown          | Jiande, Zhejiang, China | MW513756    | MW513846 | MW513894 | MW513871 | MW513918 |
|                           | JD-TXZ-7    | <i>Fragaria × ananassa</i> , crown          | Jiande, Zhejiang, China | MW513757    | MW513847 | MW513895 | MW513872 | MW513919 |
|                           | JD-TXZ-12   | <i>Fragaria × ananassa</i> , crown          | Jiande, Zhejiang, China | MW513758    | MW513848 | MW513896 | MW513873 | MW513920 |
|                           | JD-TXZ-15   | <i>Fragaria × ananassa</i> , crown          | Jiande, Zhejiang, China | MW513759    | MW513849 | MW513897 | MW513874 | MW513921 |
|                           | JD-TXZ-18   | <i>Fragaria × ananassa</i> , crown          | Jiande, Zhejiang, China | MW513760    | MW513850 | MW513898 | MW513875 | MW513922 |
|                           | YH-YX-1     | <i>Fragaria × ananassa</i> , crown          | Jiande, Zhejiang, China | MW513772    | MW513862 | MW513910 | MW513886 | MW513934 |
|                           | YH-YX-6     | <i>Fragaria × ananassa</i> , crown          | Jiande, Zhejiang, China | MW513773    | MW513863 | MW513911 | MW513887 | MW513935 |
|                           | YH-YX-10    | <i>Fragaria × ananassa</i> , crown          | Jiande, Zhejiang, China | MW513774    | MW513864 | MW513912 | MW513888 | MW513936 |

|                                |                                    |                         |          |          |          |          |          |
|--------------------------------|------------------------------------|-------------------------|----------|----------|----------|----------|----------|
| ZS-HX-111                      | <i>Fragaria × ananassa</i> , crown | Jiande, Zhejiang, China | MW513766 | MW513856 | MW513904 | MW513880 | MW513928 |
| ZS-ZJ-6                        | <i>Fragaria × ananassa</i> , crown | Jiande, Zhejiang, China | MW513767 | MW513857 | MW513905 | MW513881 | MW513929 |
| ZS-ZJ-2                        | <i>Fragaria × ananassa</i> , crown | Jiande, Zhejiang, China | OR659016 | OR660069 | OR660074 | OR660079 | OR660084 |
| ZS-ZJ-32                       | <i>Fragaria × ananassa</i> , crown | Jiande, Zhejiang, China | MW513769 | MW513859 | MW513907 | MW513883 | MW513931 |
| ZS-ZJ-49                       | <i>Fragaria × ananassa</i> , crown | Jiande, Zhejiang, China | MW513770 | MW513860 | MW513908 | MW513884 | MW513932 |
| ZS-ZJ-53                       | <i>Fragaria × ananassa</i> , crown | Jiande, Zhejiang, China | MW513771 | MW513861 | MW513909 | MW513885 | MW513933 |
| H33                            | <i>Fragaria × ananassa</i> , crown | Jiande, Zhejiang, China | OQ597804 | OQ604728 | OQ604691 | OQ604765 | OQ604802 |
| H35                            | <i>Fragaria × ananassa</i> , crown | Jiande, Zhejiang, China | OQ597805 | OQ604729 | OQ604692 | OQ604766 | OQ604803 |
| H37                            | <i>Fragaria × ananassa</i> , crown | Jiande, Zhejiang, China | OQ597806 | OQ604730 | OQ604693 | OQ604767 | OQ604804 |
| H39                            | <i>Fragaria × ananassa</i> , crown | Jiande, Zhejiang, China | OQ597807 | OQ604731 | OQ604694 | OQ604768 | OQ604805 |
| H59                            | <i>Fragaria × ananassa</i> , crown | Jiande, Zhejiang, China | OQ597810 | OQ604734 | OQ604697 | OQ604771 | OQ604808 |
| H63                            | <i>Fragaria × ananassa</i> , crown | Jiande, Zhejiang, China | OQ597811 | OQ604735 | OQ604698 | OQ604772 | OQ604809 |
| H70                            | <i>Fragaria × ananassa</i> , crown | Jiande, Zhejiang, China | OQ597812 | OQ604736 | OQ604699 | OQ604773 | OQ604810 |
| H85                            | <i>Fragaria × ananassa</i> , crown | Jiande, Zhejiang, China | OQ597813 | OQ604737 | OQ604700 | OQ604774 | OQ604811 |
| H87                            | <i>Fragaria × ananassa</i> , crown | Jiande, Zhejiang, China | OQ597814 | OQ604738 | OQ604701 | OQ604775 | OQ604812 |
| H88                            | <i>Fragaria × ananassa</i> , crown | Jiande, Zhejiang, China | OQ597815 | OQ604739 | OQ604702 | OQ604776 | OQ604813 |
| H89                            | <i>Fragaria × ananassa</i> , crown | Jiande, Zhejiang, China | OQ597816 | OQ604740 | OQ604703 | OQ604777 | OQ604814 |
| H93                            | <i>Fragaria × ananassa</i> , crown | Jiande, Zhejiang, China | OQ597818 | OQ604742 | OQ604705 | OQ604779 | OQ604816 |
| H94                            | <i>Fragaria × ananassa</i> , crown | Jiande, Zhejiang, China | OQ597819 | OQ604743 | OQ604706 | OQ604780 | OQ604817 |
| H108                           | <i>Fragaria × ananassa</i> , crown | Jiande, Zhejiang, China | OQ597821 | OQ604745 | OQ604708 | OQ604782 | OQ604819 |
| H110                           | <i>Fragaria × ananassa</i> , crown | Jiande, Zhejiang, China | OQ597822 | OQ604746 | OQ604709 | OQ604783 | OQ604820 |
| H116                           | <i>Fragaria × ananassa</i> , crown | Jiande, Zhejiang, China | OQ597825 | OQ604749 | OQ604712 | OQ604786 | OQ604823 |
| H117                           | <i>Fragaria × ananassa</i> , crown | Jiande, Zhejiang, China | OQ597826 | OQ604750 | OQ604713 | OQ604787 | OQ604824 |
| H118                           | <i>Fragaria × ananassa</i> , crown | Jiande, Zhejiang, China | OQ597827 | OQ604751 | OQ604714 | OQ604788 | OQ604825 |
| H121                           | <i>Fragaria × ananassa</i> , crown | Jiande, Zhejiang, China | OQ597828 | OQ604752 | OQ604715 | OQ604789 | OQ604826 |
| H122                           | <i>Fragaria × ananassa</i> , crown | Jiande, Zhejiang, China | OQ597829 | OQ604753 | OQ604716 | OQ604790 | OQ604827 |
| H123                           | <i>Fragaria × ananassa</i> , crown | Jiande, Zhejiang, China | OQ597830 | OQ604754 | OQ604717 | OQ604791 | OQ604828 |
| H140                           | <i>Fragaria × ananassa</i> , crown | Jiande, Zhejiang, China | OQ597831 | OQ604755 | OQ604718 | OQ604792 | OQ604829 |
| H148                           | <i>Fragaria × ananassa</i> , crown | Jiande, Zhejiang, China | OQ597833 | OQ604757 | OQ604720 | OQ604794 | OQ604831 |
| H150                           | <i>Fragaria × ananassa</i> , crown | Jiande, Zhejiang, China | OQ597834 | OQ604758 | OQ604721 | OQ604795 | OQ604832 |
| H156                           | <i>Fragaria × ananassa</i> , crown | Jiande, Zhejiang, China | OQ597835 | OQ604759 | OQ604722 | OQ604796 | OQ604833 |
| H158                           | <i>Fragaria × ananassa</i> , crown | Jiande, Zhejiang, China | OQ597836 | OQ604760 | OQ604723 | OQ604797 | OQ604834 |
| H159                           | <i>Fragaria × ananassa</i> , crown | Jiande, Zhejiang, China | OQ597837 | OQ604761 | OQ604724 | OQ604798 | OQ604835 |
| H160                           | <i>Fragaria × ananassa</i> , crown | Jiande, Zhejiang, China | OQ597838 | OQ604762 | OQ604725 | OQ604799 | OQ604836 |
| H161                           | <i>Fragaria × ananassa</i> , crown | Jiande, Zhejiang, China | OQ597839 | OQ604763 | OQ604726 | OQ604800 | OQ604837 |
| H165                           | <i>Fragaria × ananassa</i> , crown | Jiande, Zhejiang, China | OQ597840 | OQ604764 | OQ604727 | OQ604801 | OQ604838 |
| <i>C. tropicale</i> ICMP 18653 | <i>Theobroma cacao</i>             | Panama                  | JX010264 | JX009489 | JX009719 | JX009870 | JX010007 |
